# Supplementary material
Source: publisher figshare collection journal article supplement (https://acs.figshare.com/ndownloader/files/7446754)
Supplement: Supplementary file 1 [file 7446754]

## Supporting Information

Superhydrophilic      antireflective      periodic  
mesoporous      organosilica      coating      on      flexible  
polyimide      substrate      with      strong  
abrasion-resistance

*Jing Wang,<sup>†,‡,§</sup> Cong Zhang,<sup>†,§</sup> Chunming Yang,<sup>⊥</sup> Ce Zhang,<sup>†,§</sup> Mengchao Wang,<sup>†,§</sup> Jing  
Zhang,<sup>†,‡,§</sup> Yao Xu<sup>‡,\*</sup>*

<sup>†</sup> Institute of Coal Chemistry, Chinese Academy of Sciences, Taiyuan 030001, China

<sup>‡</sup> State Key Laboratory of Transient Optics and Photonics, Xi'an Institute of Optics and  
Precision Mechanics, Chinese Academy of Sciences, Xi'an 710119, China

<sup>⊥</sup> Shanghai Synchrotron Radiation Facility, Shanghai Institute of Applied Physics, Chinese  
Academy of Sciences, Shanghai 201204, China

<sup>§</sup> University of Chinese Academy of Sciences, Beijing 100049, China

Y. Xu. E-mail: [xuyao@opt.ac.cn](mailto:xuyao@opt.ac.cn)

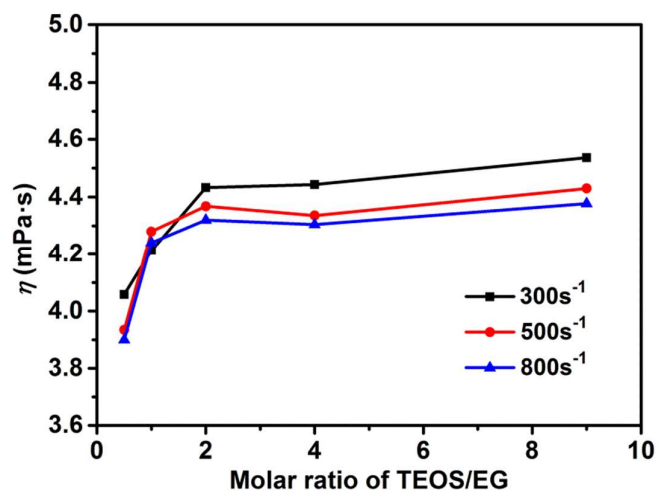

**Figure S1.** Viscosity of TEG sols with different molar ratio of TEOS/EG, obtained a shear rate of 300s<sup>-1</sup>, 500s<sup>-1</sup> and 800s<sup>-1</sup>.

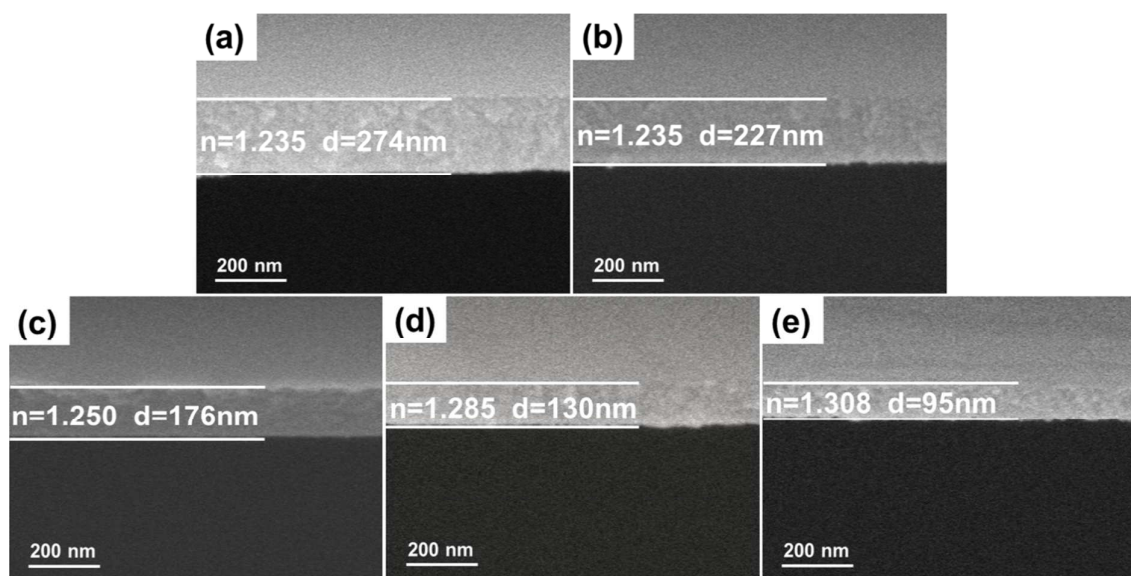

**Figure S2.** Cross-sectional SEM images of (a) TEG9-F, (b) TEG4-F, (c) TEG2-F, (d) TEG1-F, (e) TEG0.5-F.

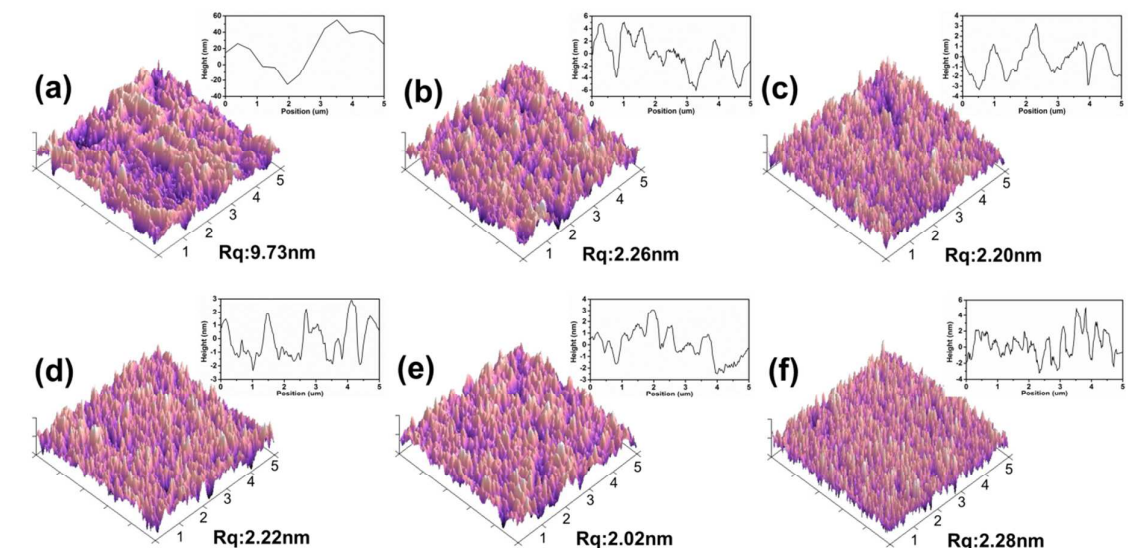

**Figure S3.** AFM images of (a) blank polyimide substrate and PMO coatings (b) TEG9-F, (c) TEG4-F, (d) TEG2-F, (e) TEG1-F, (f) TEG0.5-F. The insets are corresponding height profiles of blank polyimide substrate and PMO coatings.

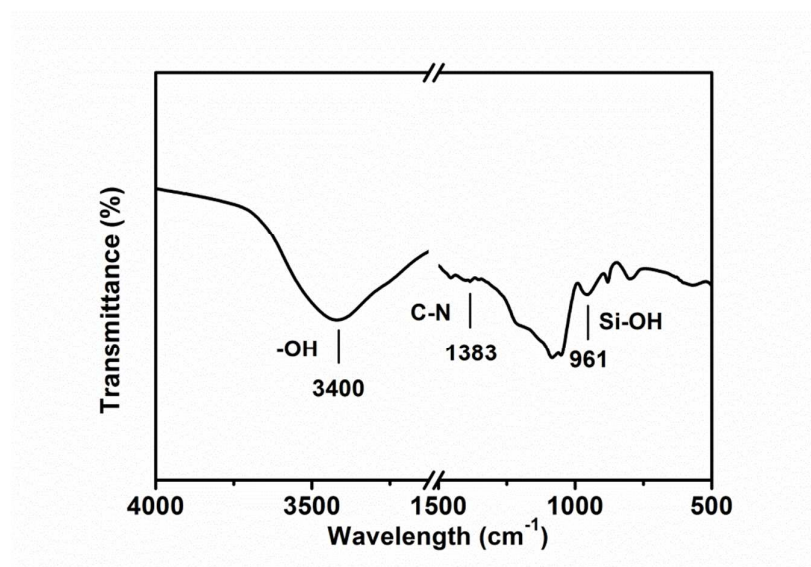

**Figure S4.** Vacuum IR spectrum of TEG2 xerogel.

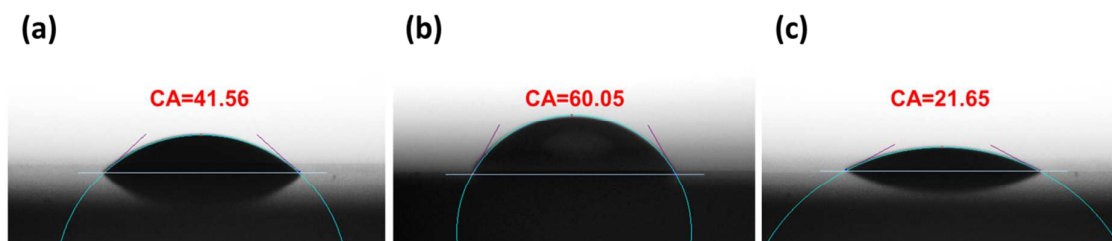

**Figure S5.** Water contact angles of (a) A-silica coating without F127, (b) EG-BSQ coating without TEOS, and (c) mesoporous silica coating without EG-BSQ.

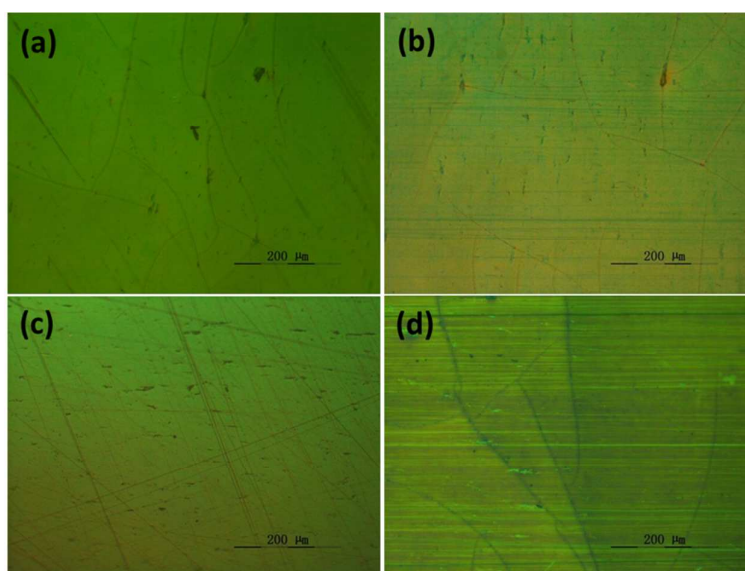

**Figure S6.** Optical microphotographs of TEG2-F on polyimide before (a) and after (b) abrasion, and blank polyimide before (c) and after (d) abrasion. Abrasion condition: 25 cycles with speed of 15 cycles per minute.
